# Supplementary material for: Exome-Wide Analysis of the DiscovEHR Cohort Reveals Novel Candidate Pharmacogenomic Variants for Clinical Pharmacogenomics
Source: MDPI journal article supplement (doi:10.3390/genes11050561), 2020-05-18
Supplement: s1 [file s1]

## **Supplemental Information**

### **Exome-wide genome analysis of the DiscovEHR cohort reveals novel candidate pharmacogenomic variants for clinical pharmacogenomics**

**Maria-Theodora Pandi <sup>1,2</sup>, Marc S. Williams <sup>3</sup>, Peter van der Spek <sup>2</sup>, Maria Koromina <sup>1</sup>,  
George P. Patrinos <sup>1,2,4,5, \*</sup>**

<sup>1</sup> Department of Pharmacy, School of Health Sciences, University of Patras, Patras, Greece;

<sup>2</sup> Erasmus University Medical Center, Faculty of Medicine and Health Sciences, Department of Pathology, Bioinformatics Unit, Rotterdam, the Netherlands;

<sup>3</sup> Geisinger, Danville, PA, USA

<sup>4</sup> United Arab Emirates University, Zayed Center of Health Sciences, Al-Ain, UAE;

<sup>5</sup> United Arab Emirates University, College of Medicine and Health Sciences, Department of Pathology, Al-Ain, UAE

**Figure S1.** Count of protein damaging missense variants based on their frequency category:

low frequency ( $0.01 \leq \text{MAF} < 0.05$ ), rare ( $0.001 \leq \text{MAF} < 0.01$ ), ultra-rare ( $\text{MAF} < 0.001$ ).

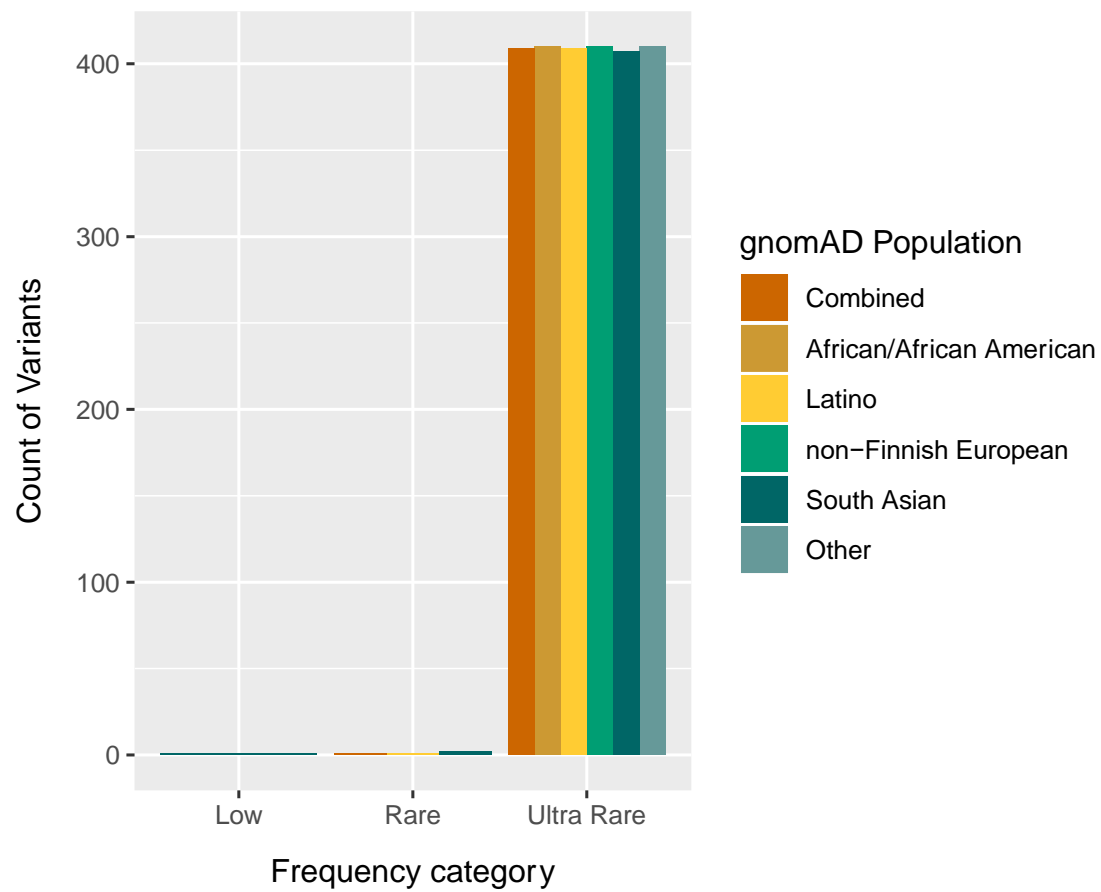

**Figure S2.** Boxplot of the MAFs (0% - 0.04%) of the protein damaging missense PGx variants, identified within the DiscovEHR cohort, within various gnomAD populations. Abbreviations: MAF, minor allele frequency; PGx, pharmacogenomics; AF, combined gnomAD population; AFR\_AF, African/African American; AMR\_AF, Latino; NFE\_AF, Non-Finnish European; SAS\_AF, South Asian; OTH\_AF, Other.

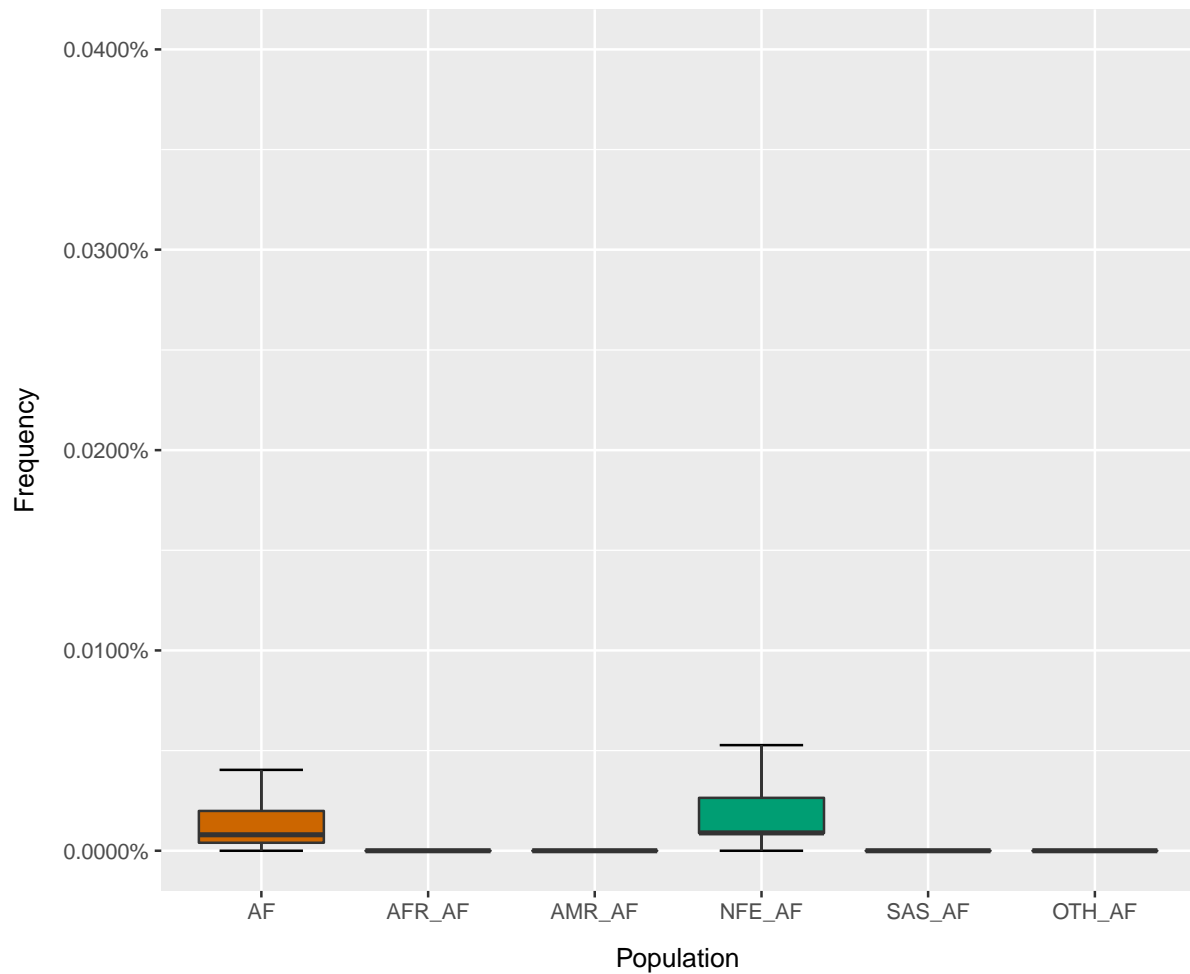

**Table S1.** Presentation of the 231 pharmacogenes according to their HGNC symbol (taken from Arbitrio M, Di Martino MT, Scionti F, et al. DMET™ (Drug Metabolism Enzymes and Transporters): a pharmacogenomic platform for precision medicine. Oncotarget.

2016;7(33):54028-54050. doi:10.18632/oncotarget.9927)

File name: Supplemental\_Table\_1.csv

**Table S2.** Count of shared PharmGKB variants between Lakiotaki et al. (2017) and DiscovEHR cohort according to the pharmacogene family and the VEP consequence based on Sequence Ontology terms. Abbreviations: ENZ I, Phase I metabolizing enzymes; ENZ II, Phase II metabolizing enzymes.

| <b>Consequence</b>                           | <b>Number of variants per Pharmacogene category</b>    |
|----------------------------------------------|--------------------------------------------------------|
| 3_prime_UTR_variant                          | EnzII: 4                                               |
| frameshift_variant                           | EnzI: 2                                                |
| frameshift_variant,splice_region_variant     | EnzI: 2                                                |
| inframe_deletion,splice_region_variant       | EnzI: 1                                                |
| intron_variant                               | EnzI: 8<br>EnzII: 37<br>Other: 1                       |
| missense_variant                             | EnzI: 154<br>EnzII: 54<br>Transporters: 17<br>Other: 5 |
| missense_variant,splice_region_variant       | EnzI: 3                                                |
| splice_acceptor_variant                      | EnzI: 1                                                |
| splice_donor_variant                         | EnzI: 1                                                |
| splice_donor_variant,coding_sequence_variant | EnzI: 1                                                |
| start_lost                                   | EnzI: 2                                                |
| stop_gained                                  | EnzI: 2<br>EnzII: 2                                    |
| synonymous_variant                           | EnzI: 10<br>EnzII: 18<br>Transporters: 5<br>Other: 2   |
| upstream_gene_variant                        | EnzI: 1                                                |

**Table S3.** Distribution of the 91 variants, which were found both in the DiscovEHR dataset and the gene-specific tables from PharmGKB, based on the VEP impact prediction and the protein function information as retrieved from PharmGKB. Normal function is coded as normal, possibly decreased protein function as possibly decreased, decreased protein function as decreased, and, absence of protein function or no function as no.

|                    | <b>IMPACT</b> |          |     |          |
|--------------------|---------------|----------|-----|----------|
| <b>Function</b>    | HIGH          | MODERATE | LOW | MODIFIER |
| Normal             | 0             | 37       | 5   | 1        |
| Possibly Decreased | 0             | 7        | 0   | 0        |
| Decreased          | 0             | 10       | 0   | 3        |
| No                 | 9             | 17       | 1   | 1        |
